# Supplementary material for: Cancer Stage, Treatment, and Survival Among Transgender Patients in the United States
Source: PubMed Central journal article supplement — J Natl Cancer Inst. 2021 Mar 11;113(9):1221–7. doi: 10.1093/jnci/djab028 (PMC8522352; doi:10.1093/jnci/djab028), 2021-03-11

## SUPPLEMENTARY MATERIALS

Supplementary Table 1. International Classification of Diseases for Oncology, 3rd Edition topography and morphology codes for primary cancers identified among patients in the National Cancer Database, 2003 – 2016

| Cancer site                       | ICD-O-3 topography code | ICD-O-3 morphology codes                                                                                                                                                                                                     |
|-----------------------------------|-------------------------|------------------------------------------------------------------------------------------------------------------------------------------------------------------------------------------------------------------------------|
| Acute Lymphocytic Leukemia        | C910                    | All <sup>a</sup>                                                                                                                                                                                                             |
| Acute Myeloid Leukemia            | C920                    | All <sup>a</sup>                                                                                                                                                                                                             |
| Anus, Anal Canal & Anorectum      | C210 – C218             | All <sup>a</sup>                                                                                                                                                                                                             |
| Brain & Other Nervous System      | C710 – C719, C728, C729 | All <sup>a</sup>                                                                                                                                                                                                             |
| Breast                            | C500 – C509             | All <sup>a</sup>                                                                                                                                                                                                             |
| Chronic Lymphocytic Leukemia      | C911                    | All <sup>a</sup>                                                                                                                                                                                                             |
| Colon                             | C180 – C189, C199       | All <sup>a</sup>                                                                                                                                                                                                             |
| Esophagus                         | C150 – C159             | All <sup>a</sup>                                                                                                                                                                                                             |
| Hodgkin Lymphoma                  | Any                     | 9650–9667                                                                                                                                                                                                                    |
| Kidney & Renal Pelvis             | C649, C659              | All <sup>a</sup>                                                                                                                                                                                                             |
| Larynx                            | C320                    | All <sup>a</sup>                                                                                                                                                                                                             |
| Liver & Intrahepatic Bile Duct    | C220, C21               | All <sup>a</sup>                                                                                                                                                                                                             |
| Lung & Bronchus                   | C340 – C349             | All <sup>a</sup>                                                                                                                                                                                                             |
| Melanoma of the Skin              | C440 – C449             | 8720–8790                                                                                                                                                                                                                    |
| Multiple Myeloma                  | C900                    | All <sup>a</sup>                                                                                                                                                                                                             |
| Non-Hodgkin Lymphoma              | Any                     | 9590–9597, 9670–9671, 9673, 9675, 9678–9680, 9684, 9687–9691, 9695, 9698–9702, 9705, 9708–9709, 9712, 9714–9719, 9724–9729, 9735, 9737–9738, 9761–9762, 9764, 9811–9818, 9820, 9823, 9826, 9827, 9831–9837, 9940, 9948, 9970 |
| Other & Unspecified Primary Sites | C96                     | All <sup>a</sup>                                                                                                                                                                                                             |
| Other Digestive Organs            | C268 – C269, C488       | All <sup>a</sup>                                                                                                                                                                                                             |
| Other Leukemia                    | C420, C421, C424        | All <sup>a</sup>                                                                                                                                                                                                             |
| Other Non-Epithelial Skin         | C440 – C449             | Excluding 8000-8005, 8010-8046, 8050-8084, 8090-8110, 8720-8790 <sup>a</sup>                                                                                                                                                 |
| Ovary                             | C569                    | All <sup>a</sup>                                                                                                                                                                                                             |
| Pancreas                          | C250 – C259             | All <sup>a</sup>                                                                                                                                                                                                             |
| Pharynx                           | C10, C13, C140          | All <sup>a</sup>                                                                                                                                                                                                             |
| Prostate                          | C619                    | All <sup>a</sup>                                                                                                                                                                                                             |

|                                |                          |                  |
|--------------------------------|--------------------------|------------------|
| Rectum                         | C209                     | All <sup>a</sup> |
| Small Intestine                | C170 – C179              | All <sup>a</sup> |
| Soft Tissue (including Heart)  | C380, C47, C49           | All <sup>a</sup> |
| Stomach                        | C160 – C169              | All <sup>a</sup> |
| Testis                         | C620, C621, C629         | All <sup>a</sup> |
| Thyroid                        | C739                     | All <sup>a</sup> |
| Tongue                         | C019, C020 – C029        | All <sup>a</sup> |
| Urinary Bladder                | C670 – C689              | All <sup>a</sup> |
| Uterine Corpus                 | C540 – C559              | All <sup>a</sup> |
| Uterine Cervix                 | C530 – C531, C538 – C539 | All <sup>a</sup> |
| Vagina & Other Genital, Female | C529, C570 – C579        | All <sup>a</sup> |
| Vulva                          | C510 – C512, C518 – C519 | All <sup>a</sup> |

---

<sup>a</sup>Cancers with the histology codes 9050 – 9055, 9140, and 9590 – 9989 were excluded.

Supplementary Table 2. Associations between transgender patients with stage at cancer diagnosis and receipt of cancer treatment by cancer site adjusted for type of health insurance among patients in the National Cancer Database, 2003 – 2016

| Cancer site                    | Cancer stage at diagnosis <sup>a</sup> | No. transgender cases | OR (95% CI)         | Received any cancer treatment <sup>b</sup> | No. transgender cases | OR (95% CI) <sup>c</sup> |
|--------------------------------|----------------------------------------|-----------------------|---------------------|--------------------------------------------|-----------------------|--------------------------|
| Anus, Anal Canal & Anorectum   | I and II                               | 11                    | 1.00 (Referent)     | No                                         | <10 <sup>e</sup>      | 1.00 (Referent)          |
|                                | III and IV                             | 14                    | 1.61 (0.73 to 3.56) | Yes                                        | 26                    | 0.72 (0.16, 3.12)        |
| Breast                         | 0, I, and II                           | 24                    | 1.00 (Referent)     | No                                         | <10 <sup>e</sup>      | 1.00 (Referent)          |
|                                | III and IV                             | 11                    | 1.80 (0.87 to 3.70) | Yes                                        | 34                    | 1.10 (0.15, 8.30)        |
| Kidney & Renal Pelvis          | I and II                               | 19                    | 1.00 (Referent)     | No                                         | <10 <sup>e</sup>      | 1.00 (Referent)          |
|                                | III and IV                             | <10 <sup>e</sup>      | 0.65 (0.24 to 1.77) | Yes                                        | 17                    | 0.22 (0.09 to 0.55)      |
| Liver & Intrahepatic Bile Duct | I and II                               | 14                    | 1.00 (Referent)     | No                                         | 13                    | 1.00 (Referent)          |
|                                | III and IV                             | <10 <sup>e</sup>      | 0.76 (0.33 to 1.77) | Yes                                        | 13                    | 0.74 (0.33 to 1.63)      |
| Lung & Bronchus                | I and II                               | 12                    | 1.00 (Referent)     | No                                         | 20                    | 1.00 (Referent)          |
|                                | III and IV                             | 63                    | 1.76 (0.95 to 3.28) | Yes                                        | 59                    | 0.81 (0.48 to 1.37)      |
| Melanoma of the Skin           | I and II                               | 11                    | 1.00 (Referent)     | No                                         | <10 <sup>e</sup>      | 1.00 (Referent)          |
|                                | III and IV                             | <10 <sup>e</sup>      | 2.11 (0.77 to 3.28) | Yes                                        | 15                    | 0.36 (0.07 to 1.86)      |
| Non-Hodgkin Lymphoma           | I and II                               | 15                    | 1.00 (Referent)     | No                                         | 12                    | 1.00 (Referent)          |
|                                | III and IV                             | 29                    | 1.59 (0.85 to 2.97) | Yes                                        | 35                    | 0.86 (0.44 to 1.68)      |
| Pancreas                       | I and II                               | <10 <sup>e</sup>      | 1.00 (Referent)     | No                                         | <10 <sup>e</sup>      | 1.00 (Referent)          |
|                                | III and IV                             | 10                    | 1.12 (0.41 to 3.08) | Yes                                        | <10 <sup>e</sup>      | 0.35 (0.12 to 1.00)      |
| Prostate <sup>d</sup>          | I and II                               | 25                    | 1.00 (Referent)     | No                                         | <10 <sup>e</sup>      | 1.00 (Referent)          |
|                                | III and IV                             | 10                    | 1.69 (0.81 to 3.55) | Yes                                        | 30                    | 0.95 (0.39 to 2.31)      |
| Rectum                         | I and II                               | 12                    | 1.00 (Referent)     | No                                         | 0                     | 1.00 (Referent)          |
|                                | III and IV                             | 11                    | 0.80 (0.35 to 1.82) | Yes                                        | 26                    | — <sup>f</sup>           |
| Urinary Bladder                |                                        |                       |                     |                                            |                       |                          |

|              |                  |                     |     |    |                 |
|--------------|------------------|---------------------|-----|----|-----------------|
| 0, I, and II | <10 <sup>e</sup> | 1.00 (Referent)     | No  | 0  | 1.00 (Referent) |
| III and IV   | <10 <sup>e</sup> | 2.11 (0.76 to 5.89) | Yes | 15 | — <sup>f</sup>  |

<sup>a</sup>OR calculated with multivariable logistic regression for the association of being transgender (using cisgender as reference group) with Stages III and IV vs Stage 0 (if applicable), I, and II, adjusted for age at diagnosis (18–44, 45–54, 55–64, or ≥65 years), year of diagnosis (2004–2006, 2007–2010, or 2011–2014), race/ethnicity (non-Hispanic White, non-Hispanic Black, Hispanic, or other), and insurance status (private insurance, 18–64 Medicare/Medicaid, ≥65 Medicare/Medicaid, uninsured, or Government/unknown).

<sup>b</sup>Cancer treatment is defined as chemotherapy, surgery, and radiotherapy for all sites except lymphoma. Treatment for lymphoma, is defined as chemotherapy and radiotherapy.

<sup>c</sup>OR calculated with multivariable logistic regression for the association of being transgender (using cisgender as reference group) with cancer treatment, adjusted for age at diagnosis (18–44, 45–54, 55–64, or ≥65 years), year of diagnosis (2004–2006, 2007–2010, or 2011–2014), race/ethnicity (non-Hispanic White, non-Hispanic Black, Hispanic, or other), and insurance status (private insurance, 18–64 Medicare/Medicaid, ≥65 Medicare/Medicaid, uninsured, or Government/unknown), and AJCC stage (0-II, III/IV, or unknown).

<sup>d</sup>Sex-specific site uses cisgender only as reference group.

<sup>e</sup>Cells with more than 0 but fewer than 10 individuals are suppressed.

<sup>f</sup>An em-dash indicates that the cell size is too small to calculate the OR.

Abbreviation: AJCC, American Joint Committee on Cancer; CI: confidence interval; No, number; and OR, odds ratio.

Supplementary Table 3. Associations between transgender patients and mortality after cancer diagnosis adjusted for type of health insurance by cancer site among patients in the National Cancer Database 2003 – 2013

| Cancer Site                    | Gender Identity | No. of deaths    | HR (95% CI) <sup>a</sup> |
|--------------------------------|-----------------|------------------|--------------------------|
| Anus, Anal Canal & Anorectum   | Cisgender       | 16,193           | 1.00 (Referent)          |
|                                | Transgender     | <10 <sup>b</sup> | 0.76 (0.40 to 1.47)      |
| Breast                         | Cisgender       | 35,8042          | 1.00 (Referent)          |
|                                | Transgender     | <10 <sup>b</sup> | 1.20 (0.57 to 2.53)      |
| Kidney & Renal Pelvis          | Cisgender       | 127,260          | 1.00 (Referent)          |
|                                | Transgender     | <10 <sup>b</sup> | 1.29 (0.61 to 2.71)      |
| Liver & Intrahepatic Bile Duct | Cisgender       | 111,818          | 1.00 (Referent)          |
|                                | Transgender     | 19               | 1.02 (0.65 to 1.61)      |
| Lung & Bronchus                | Cisgender       | 1,047,162        | 1.00 (Referent)          |
|                                | Transgender     | 46               | 0.99 (0.74 to 1.32)      |
| Melanoma of the Skin           | Cisgender       | 78,729           | 1.00 (Referent)          |
|                                | Transgender     | <10 <sup>b</sup> | 0.94 (0.45 to 1.97)      |
| Non-Hodgkin Lymphoma           | Cisgender       | 165,989          | 1.00 (Referent)          |
|                                | Transgender     | 20               | 2.03 (1.31 to 3.14)      |
| Pancreas                       | Cisgender       | 212,072          | 1.00 (Referent)          |
|                                | Transgender     | <10 <sup>b</sup> | 1.10 (0.63 to 1.94)      |
| Prostate                       | Cisgender       | 261,123          | 1.00 (Referent)          |
|                                | Transgender     | <10 <sup>b</sup> | 1.73 (0.96 to 3.12)      |
| Rectum                         | Cisgender       | 128,998          | 1.00 (Referent)          |
|                                | Transgender     | <10 <sup>b</sup> | 1.39 (0.79 to 2.44)      |
| Urinary Bladder                | Cisgender       | 118,948          | 1.00 (Referent)          |
|                                | Transgender     | <10 <sup>b</sup> | 2.53 (1.21 to 5.31)      |

<sup>a</sup>Adjusted for age at diagnosis, (18–44, 45–54, 55–64, or ≥65 years), year of diagnosis (2003–2007, 2008–2011, or 2012–2013), race/ethnicity (non-Hispanic White, Black, Hispanic, or other), health insurance status (private insurance, 18-64 Medicare/Medicaid, ≥65 Medicare/Medicaid, uninsured, or Government/unknown), AJCC stage (0-II, III/IV, or unknown), and treatment (yes or no).

<sup>b</sup>Cells with more than 0 and fewer than 10 individuals are suppressed.

Abbreviations: AJCC, American Joint Committee on Cancer; CI, confidence interval; HR, hazard ratio; No, number.

Supplementary Table 4. Associations between transgender patients with receipt of cancer treatment by cancer site among patients in the National Cancer Database, 2003 – 2016, excluding individuals who refused treatment with and without adjustment for type of health insurance

| Cancer Site                    | Received any cancer treatment <sup>a</sup> | No. transgender cases | Model 1 OR (95% CI) <sup>b</sup> | Model 2 OR (95% CI) <sup>c</sup> |
|--------------------------------|--------------------------------------------|-----------------------|----------------------------------|----------------------------------|
| Anus, Anal Canal & Anorectum   | No                                         | <10 <sup>e</sup>      | 1.00 (Referent)                  | 1.00 (Referent)                  |
|                                | Yes                                        | 26                    | 0.68 (0.16 to 2.94)              | 0.59 (0.14 to 2.57)              |
| Breast                         | No                                         | <10 <sup>e</sup>      | 1.00 (Referent)                  | 1.00 (Referent)                  |
|                                | Yes                                        | 34                    | 1.03 (0.14 to 7.76)              | 0.91 (0.12 to 6.81)              |
| Kidney & Renal Pelvis          | No                                         | <10 <sup>e</sup>      | 1.00 (Referent)                  | 1.00 (Referent)                  |
|                                | Yes                                        | 17                    | 0.26 (0.10 to 0.68)              | 0.22 (0.09 to 0.59)              |
| Liver & Intrahepatic Bile Duct | No                                         | 13                    | 1.00 (Referent)                  | 1.00 (Referent)                  |
|                                | Yes                                        | 13                    | 0.73 (0.33 to 1.60)              | 0.64 (0.29 to 1.42)              |
| Lung & Bronchus                | No                                         | 20                    | 1.00 (Referent)                  | 1.00 (Referent)                  |
|                                | Yes                                        | 59                    | 0.81 (0.48 to 1.38)              | 0.74 (0.43 to 1.26)              |
| Melanoma of the Skin           | No                                         | <10 <sup>e</sup>      | 1.00 (Referent)                  | 1.00 (Referent)                  |
|                                | Yes                                        | 15                    | 0.36 (0.07 to 1.85)              | 0.34 (0.07 to 1.75)              |
| Non-Hodgkin Lymphoma           | No                                         | 12                    | 1.00 (Referent)                  | 1.00 (Referent)                  |
|                                | Yes                                        | 35                    | 0.86 (0.44 to 1.67)              | 0.86 (0.44 to 1.69)              |
| Pancreas                       | No                                         | <10 <sup>e</sup>      | 1.00 (Referent)                  | 1.00 (Referent)                  |
|                                | Yes                                        | <10 <sup>e</sup>      | 0.37 (0.13 to 1.09)              | 0.35 (0.12 to 1.02)              |
| Prostate <sup>d</sup>          | No                                         | <10 <sup>e</sup>      | 1.00 (Referent)                  | 1.00 (Referent)                  |
|                                | Yes                                        | 30                    | 0.94 (0.39 to 2.29)              | 0.82 (0.34 to 1.99)              |
| Rectum                         | No                                         | 0                     | 1.00 (Referent)                  | 1.00 (Referent)                  |
|                                | Yes                                        | 26                    | — <sup>f</sup>                   | — <sup>f</sup>                   |
| Urinary Bladder                | No                                         | 0                     | 1.00 (Referent)                  | 1.00 (Referent)                  |
|                                | Yes                                        | 15                    | — <sup>f</sup>                   | — <sup>f</sup>                   |

<sup>a</sup>Cancer treatment is defined as chemotherapy, surgery, and radiotherapy for cancer site except lymphoma; for lymphoma, chemotherapy and radiotherapy are defined as cancer treatment. Patients who refused treatment were excluded.

<sup>b</sup>OR calculated with multivariable logistic regression for the association of being transgender (using cisgender as reference group) with cancer treatment, adjusted for age at diagnosis (18–44, 45–54, 55–64, or ≥65 years), year of diagnosis (2004–2006, 2007–2010, or 2011–2014), race/ethnicity (non-Hispanic White, non-Hispanic Black, Hispanic, or other), insurance status (private insurance, 18–64 Medicare/Medicaid, ≥65 Medicare/Medicaid, uninsured, or Government/unknown), and AJCC stage (0-II, III/IV, or unknown).

<sup>c</sup>OR calculated with multivariable logistic regression for the association of being transgender (using cisgender as reference group) with cancer treatment, adjusted for age at diagnosis (18–44, 45–54, 55–64, or ≥65 years), year of diagnosis (2004–2006, 2007–2010, or 2011–2014), race/ethnicity (non-Hispanic White, non-Hispanic Black, Hispanic, or other), and AJCC stage (0-II, III/IV, or unknown).

<sup>d</sup>Sex-specific site which only use cismen as reference group.

---

<sup>e</sup>Cells with more than 0 but fewer than 10 individuals are suppressed.

<sup>f</sup>An em-dash indicates that the cell size is too small to calculate the OR.

Abbreviations: AJCC, American Joint Committee on Cancer; CI, confidence interval; OR, odds ratio; No, number.

Supplementary Figure 1. CONSORT Flow Diagram for Cancer Stage, Treatment, and Survival among Transgender Patients in the United States

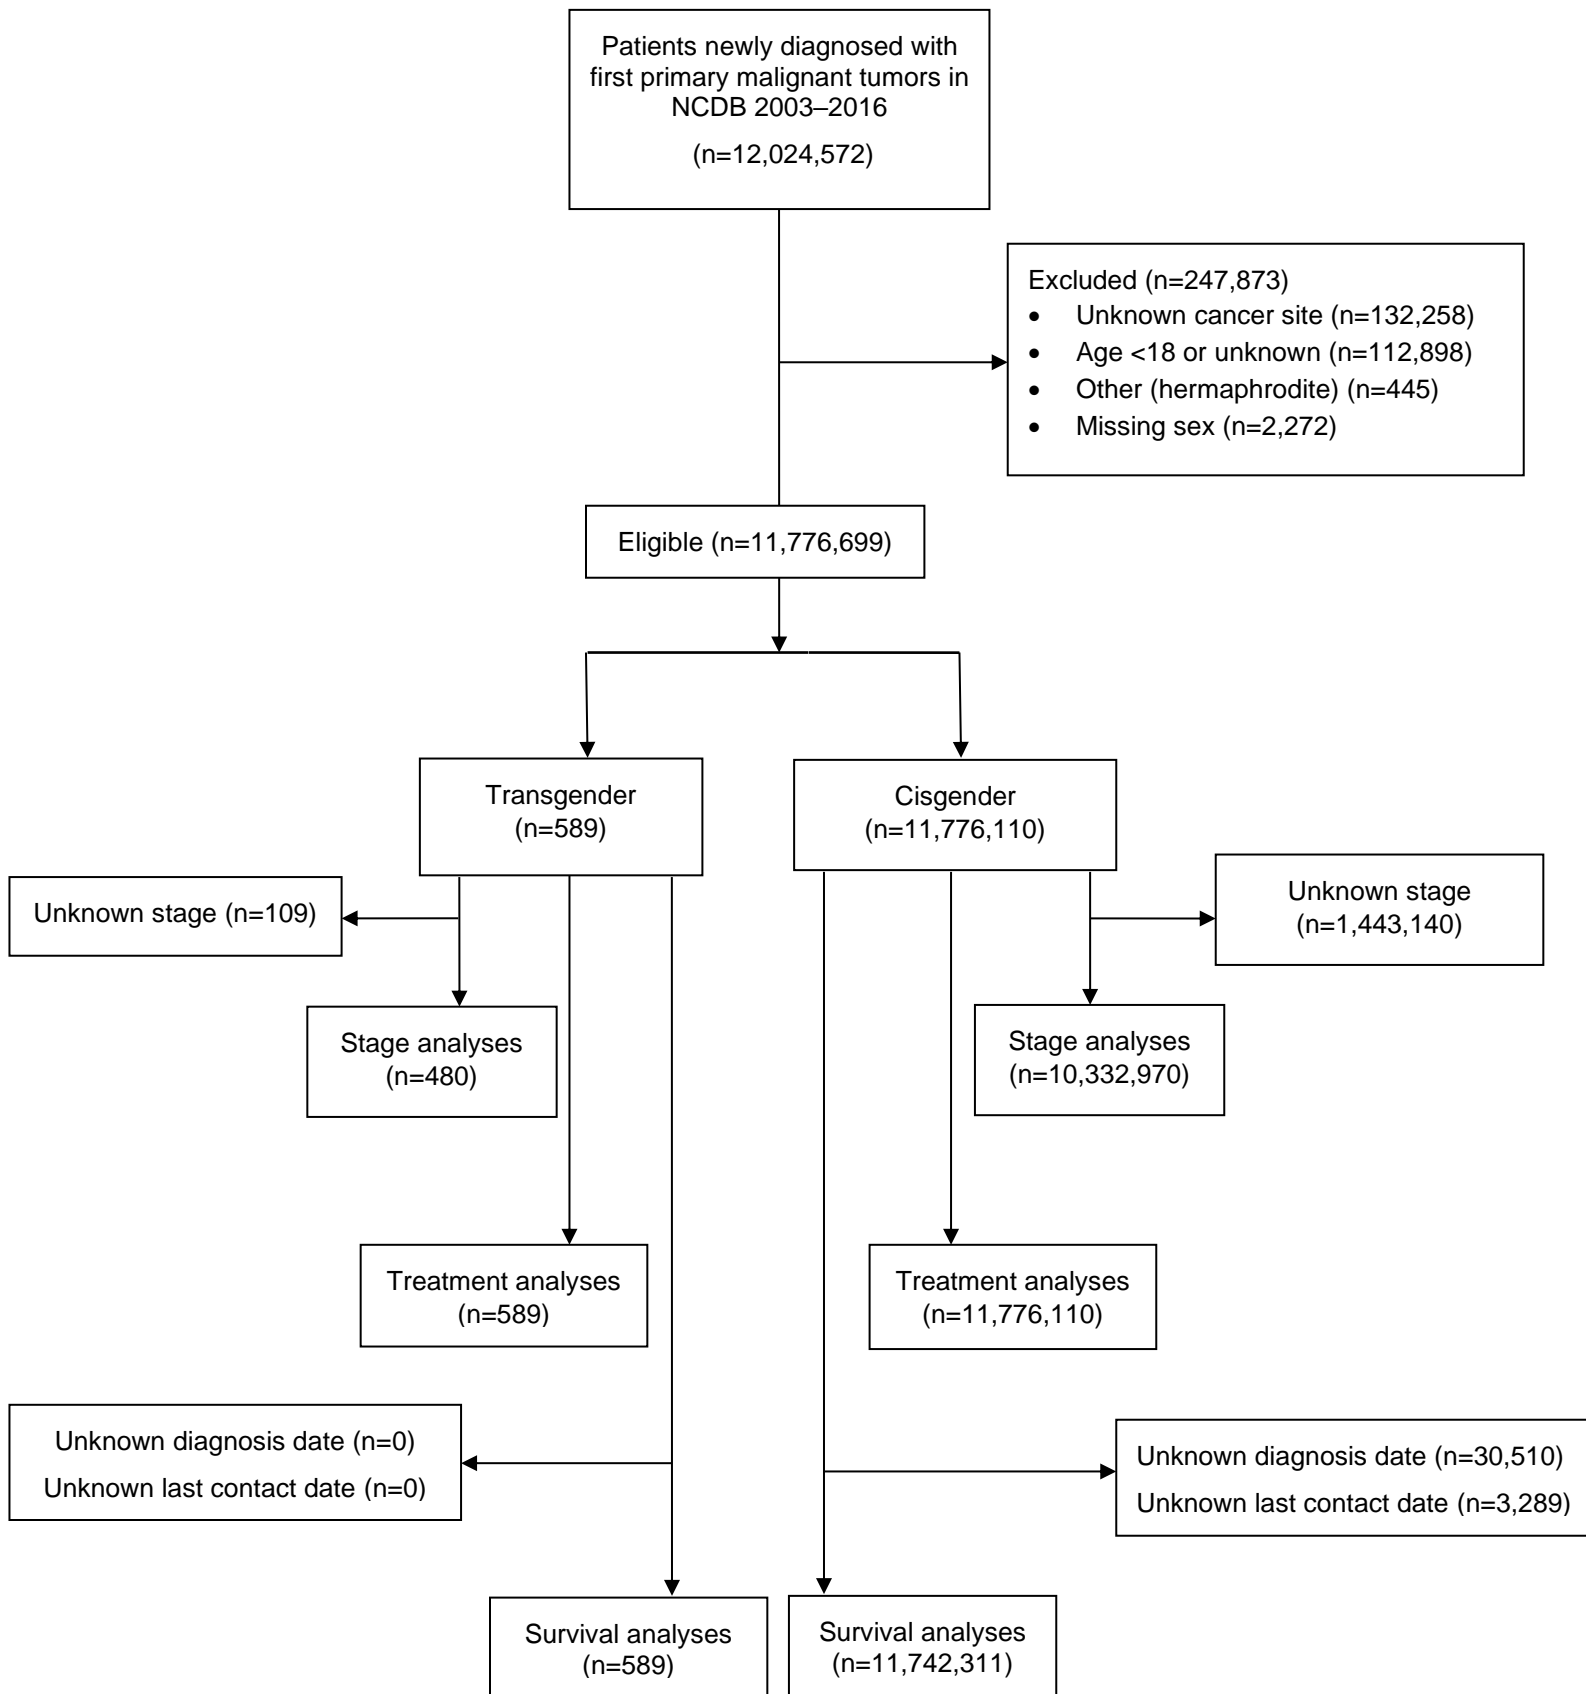

Supplement: djab028_supplementary_data.pdf [file djab028_supplementary_data.pdf]
